# Supplementary material for: M-Cells Contribute to the Entry of an Oral Vaccine but Are Not Essential for the Subsequent Induction of Protective Immunity against Francisella tularensis
Source: PubMed Central journal article supplement (PMC4839702; doi:10.1371/journal.pone.0153402), 2016-04-21
Supplement: pone.0153402.s005.pdf [file pone.0153402.s005.pdf]

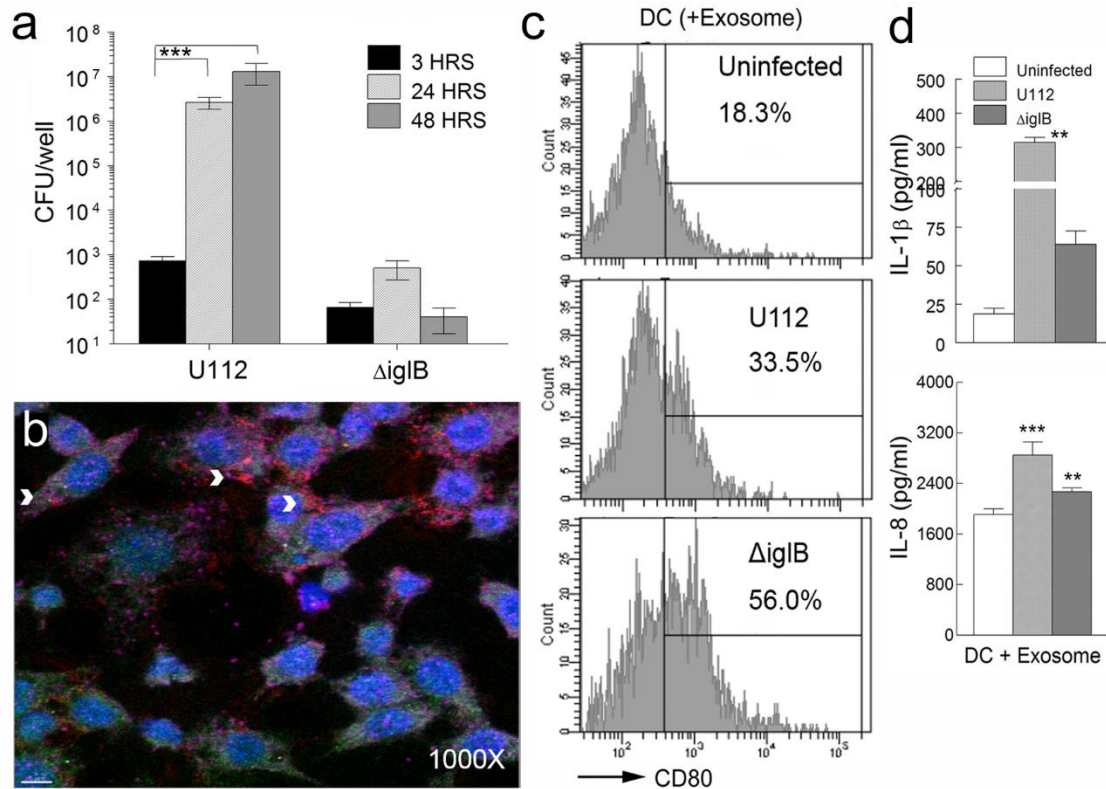

**Supplemental Figure 5. GC-like HT29 cells can uptake *Francisella* and subsequently activate DCs by exosomes.** HT29 GC-like cells (grown in DMEM containing 10% FBS and 4.5% of galactose for 4 days) were seeded into 96-well plates ( $2 \times 10^5$  cells/well) and upon adherence were infected with 100 MOI of either U112 or  $\Delta$ iglB for 2 hrs, gentamicin treated for 1 hr, then cultured in antibiotic-free medium. (a-b) At 3, 24, and 48 hrs post infection, cells were lysed with 0.2% deoxycholate solution and dilution plated to enumerate intracellular bacteria. Significant replication was seen only with U112 over the time course (\*\* $p < 0.001$ ). (b) HT29s were seeded onto coverslips ( $10^6$  cells/well in a 24 well plate) and infected for 2 hrs with 100 MOI of mCherry-labeled  $\Delta$ iglB, then were gentamicin treated for 1 hr. At 24 hrs post infection, cells were stained for confocal analysis with the nuclear stain DAPI (blue), anti-cytokeratin-18 (pink) and anti-MUC-2 (green). White arrows indicate the presence of  $\Delta$ iglB in GCs. (c-d) Exosomes (40  $\mu$ g/well) isolated from culture medium (3 hrs post infection) were incubated with DCs (derived from human monocytes by culturing with GM-CSF and IL-4 for one week,  $5 \times 10^5$ /well). Flow cytometry analysis was used to assay for expression and upregulation of CD80 (d) and levels of IL-1 $\beta$  and IL-8 in supernatants were measured by ELISA (e), with \*\* denoting  $p < 0.01$  and \*\*\* denoting  $p < 0.005$ . Representative images from duplicate experiments and data from 3 experiments are shown are shown.
