# Supplementary material for: M-Cells Contribute to the Entry of an Oral Vaccine but Are Not Essential for the Subsequent Induction of Protective Immunity against Francisella tularensis
Source: PLOS journal article supplement (doi:10.1371/journal.pone.0153402), 2016-04-21
Supplement: S3 (10.1371/journal.pone.0153402.s003) [file journal.pone.0153402.s003]

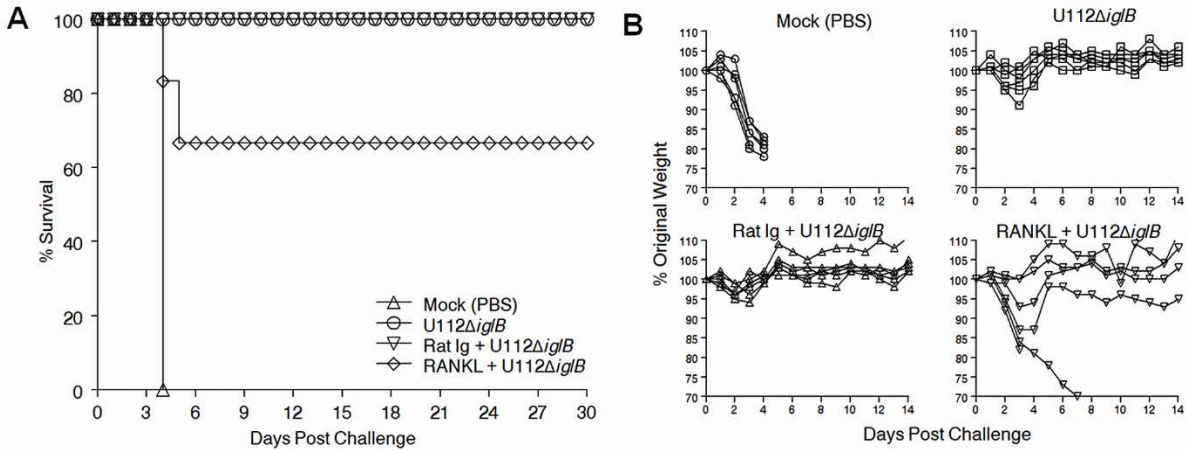

**Supplemental Figure 3. M-cell depleted animals survived homotypic challenge.** As intranasal administration of LVS reflects a heterotypic *F. tularensis* challenge, we also examined whether there would be significant differences in survival following a homotypic challenge with the WT *F. novicida* strain U112. U112 replicates more rapidly than LVS, with colonies on plates after 16-18 hrs of incubation compared to the 48-72 hr incubation of subspecies *holarctica* or *tularensis*, and is much more virulent in the mouse ( $LD_{50} < 10$  CFU i.n.) compared to LVS ( $LD_{50} \sim 4,500$  CFU). We assessed whether i.n. challenge with U112 would alter the survival of M-cell depleted animals. Mice received 1000 CFU U112 (approx. 100  $LD_{50}$ ) 30 days post-vaccination. We observed 100% survival in vaccinated controls, 66% survival in M-cell depleted, vaccinated animals, and no survival in mock vaccinated animals which succumbed to infection by day 4 ( $p < 0.01$  compared to vaccinated groups).
